# Supplementary material
Source: PubMed Central journal article supplement (PMC4125407)
Supplement: 6b34c468ca99da3ebeadb84d6904b772_genetics.114.166165-6.pdf [file 6b34c468ca99da3ebeadb84d6904b772_genetics.114.166165-6.pdf]

**Table S2 Hardy-Weinberg Equilibrium analysis of the region of *Ap3m2* at the time of the F2 mapping.**

|          | AA | AB | BB | observed |      | expected |      | $P(X)^2$ | $X^2$    |
|----------|----|----|----|----------|------|----------|------|----------|----------|
|          |    |    |    | $p$      | $q$  | $p$      | $q$  |          |          |
| D8Mit4   | 24 | 46 | 17 | 47       | 40   | 43.5     | 43.5 | 0.452966 | 86.88635 |
| D8Mit25  | 27 | 44 | 17 | 49       | 39   | 44       | 44   | 0.286422 | 93.95222 |
| D8Mit312 | 22 | 48 | 20 | 46       | 44   | 45       | 45   | 0.833029 | 76.11416 |
| D8Mit113 | 30 | 37 | 17 | 48.5     | 35.5 | 42       | 42   | 0.156069 | 95.98514 |
| D8Mit320 | 23 | 45 | 19 | 45.5     | 41.5 | 43.5     | 43.5 | 0.668036 | 79.78677 |
