# Supplementary material
Source: PubMed Central journal article supplement (PMC4125407)
Supplement: 7f7888c575697c48cb4e3e888df59020_genetics.114.166165-3.pdf [file 7f7888c575697c48cb4e3e888df59020_genetics.114.166165-3.pdf]

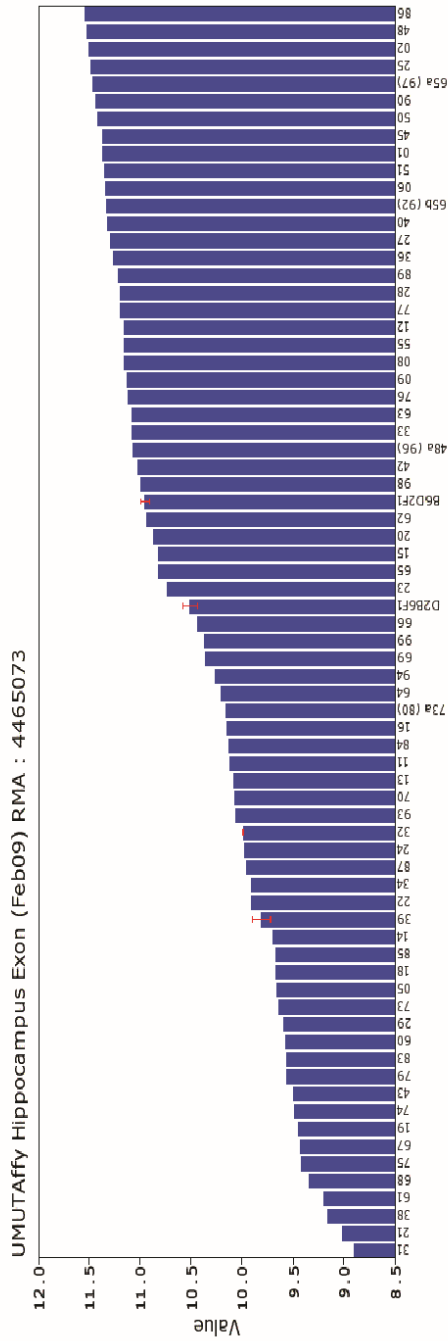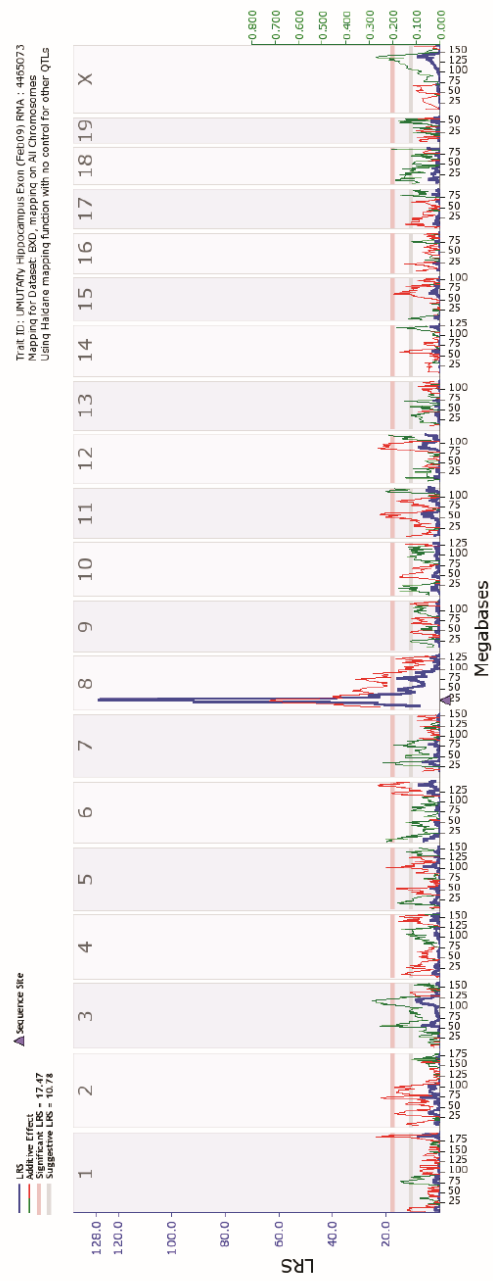

**Figure S3** (A) Log<sub>2</sub> expression levels for *Ap3m2* in hippocampus of BXD RI strains and (B) corresponding cis eQTL signal. Chromosome numbers are at the top of the plot. The blue line represents the likelihood ratio statistic (LRS) across the genome. Two horizontal lines mark the genome-wide significance levels at  $p < 0.05$  (red line) and  $p < 0.63$  (gray line).
