# Supplementary material
Source: PubMed Central journal article supplement (PMC4125407)
Supplement: 470e671c95ac51d4b591a5fbff740c12_genetics.114.166165-2.pdf [file 470e671c95ac51d4b591a5fbff740c12_genetics.114.166165-2.pdf]

**Table S1 Table of oligonucleotide primer pairs used for the sequencing of *Ap3m2* and genotyping of *Ap3m2KO* mice.**

| Primer Sequence 5' to 3'               | Primer Name    |
|----------------------------------------|----------------|
| ATG CTG GAC AAT GGG TTC CCC            | Ap3m2WTFwd     |
| AAT TGT AGG GTT CTC ATC GGG            | Ap3m2WTRev     |
| CAC CGG CCT CTC CAC CAT G              | Egfp_fwd       |
| GTG TTC TGC TGG TAG TGG TCG            | Egfp_REV       |
| AGC CCA CCA AAG GTT TGG T              | Ap3m2Fwdcds    |
| GAC AGT GTC GTG TTG GCA GTA TC         | Ap3m2Revcds-r  |
| GTA CTT CTC CCC GTA CAT ATC CAG A      | Ap3m23'Fwd     |
| GAA CCT CTT AAT GGG CCC TAA AG         | Ap3m23'Rev-r   |
| GGA GAC ACC CTA GTT TGT CTA CAG TG     | Ap3m25utr fwd  |
| GTG CAA GGA GCA CTG CG                 | Ap3m25utrRev-r |
| GAA ACC ACA GAG AAA CTC TAC TCG G      | Ap3m2Proxfwd   |
| CAG GAC TGA GAG GCT GGT GTG            | Ap3m2proxrev-r |
| GAG ACT CAT CTA GAT TGG CAC GAC        | Ap3m2p1r       |
| ACT GTG CAC CTG CGT TGC                | Ap3m2p1        |
| CGG TAA GAT GAA GTG TGA AGG G          | Ap3m2p2        |
| AAC AGT GTG CAG AGA AAA ATA GGC        | Ap3m2p2r       |
| GAC CGT GAC CAC TCC CTC C              | Ap3m2p3        |
| CCA GGG ACC AAC TTT CAC AAG            | Ap3m2p3r       |
| CAA ACA GAA TCA GTT TGC CGG            | Ap3m2p4        |
| CCA CCC AAC CTC AAG ATC TCT C          | Ap3m2p4r       |
| GGG ACC CTC CCT AAA TTA ACC A          | Ap3m2p5        |
| ACT GTC AGT CTG GAT AAC ACA CTG C      | Ap3m2p5r       |
| GGA AAT TGT TGT GTT CAC CTC TAC A      | Ap3m2p6        |
| CCA AGA GCT GAT CTT GAG GTT C          | Ap3m2p6r       |
| GCC ACC AGG CTC TCC AAC                | Ap3m2p7        |
| CAT TTT CTT CTG TTA TAA TGG ACC ATT CT | Ap3m2p7r       |
| CAC AGC TCT GTG AGA GAT TTG AAA C      | Ap3m2p8        |
| GTT TGC TCA GGT CTC CTG TGC            | Ap3m2p8r       |
| GAG TAG ATC TCT CGT GTG GGA AAA C      | Ap3m2p9        |
| CTG CGC TGA GCT GTT GAA C              | Ap3m2p9r       |
| CTG CTC CCC ACA ATT GAC TC             | Ap3m2p10       |
| AGT GTG ATG GTA AAT ACT GAT TTT CAA CT | Ap3m2p10r      |
