# Supplementary material
Source: PubMed Central journal article supplement (PMC4125407)
Supplement: 5349e3cf993bfc660ac95f9bcae8a3cd_genetics.114.166165-5.pdf [file 5349e3cf993bfc660ac95f9bcae8a3cd_genetics.114.166165-5.pdf]

**Table S3** (A) SNPs which exist in the region of *Ap3m2* fit the distribution pattern of C57BL/6J=I/LnJ=iWSP-2 and AKR=129=DBA2=iWSR-1 and are the likely underlying causative nucleotides involved in the altered regulation of *Ap3m2* and the phenotypic differences mapped in the two QTL studies due to their identification as being within a regulatory feature. (B) Summary of the reported experimental evidence for each of the Ensembl regulatory features identified in A.

(A)

| RefSnplD          | Build 37<br>SNP<br>location | Build 38<br>SNP<br>location | SNP Genotypes             |                              | Ensembl Regulatory<br>Feature ID | Transfac regulatory<br>features (BIOBASE ID) |
|-------------------|-----------------------------|-----------------------------|---------------------------|------------------------------|----------------------------------|----------------------------------------------|
|                   |                             |                             | C57BL/6J;<br>I/LnJ<br>(+) | 129P3/J;AKR/J;<br>DBA/2J (-) |                                  |                                              |
| rs33255299        | 23605138                    | 22494666                    | C                         | T                            |                                  | Pax-3 (M00327)                               |
| rs45867690        | 23604110                    | 22493638                    | C                         | T                            |                                  | POU1F1 (M00744)                              |
| rs33346701        | 23601865                    | 22491393                    | A                         | T                            |                                  | VDR, CAR, PXR (M00096)                       |
| rs51987012        | 23597278                    | 22486806                    | A                         | G                            | ENSMUSR00000225022               | VDR, CAR, PXR (M00096)                       |
| rs45944337        | 23597260                    | 22486788                    | A                         | T                            | ENSMUSR00000225022               | C - GR (M00205)                              |
| rs49759176        | 23594851                    | 22484379                    | T                         | C                            |                                  | SMAD3 (M00701)                               |
| rs32743569        | 23589809                    | 22479337                    | C                         | T                            |                                  | myogenin / NF-1 (M00056)                     |
| rs32650954        | 23589790                    | 22479318                    | T                         | C                            |                                  | myogenin / NF-1 (M00056)                     |
| <b>rs32926479</b> | 23587531                    | <b>22477059</b>             | <b>C</b>                  | <b>T</b>                     | <b>ENSMUSR00000299557</b>        |                                              |
| <b>rs25959964</b> | 23587232                    | <b>22476760</b>             | <b>C</b>                  | <b>G</b>                     | <b>ENSMUSR00000299557</b>        | <b>GABP (M00341)</b>                         |
| <b>rs52251207</b> | 23587140                    | <b>22476668</b>             | <b>T</b>                  | <b>C</b>                     | <b>ENSMUSR00000299557</b>        | <b>ETF (M00695)</b>                          |
| <b>rs32882991</b> | 23587093                    | <b>22476621</b>             | <b>T</b>                  | <b>C</b>                     | <b>ENSMUSR00000299557</b>        |                                              |
| rs33346694        | 23583851                    | 22473379                    | C                         | A                            |                                  | Kid3 (M01160);myogenin / NF-1 (M0056)        |
| rs33468918        | 23259740                    | 22149268                    | G                         | A                            |                                  | CdxA (M00101)                                |
| rs32693908        | 23259552                    | 22149080                    | A                         | T                            |                                  | myogenin / NF-1 (M00056)                     |
| rs33391608        | 23259407                    | 22148935                    | C                         | T                            |                                  | myogenin / NF-1 (M00056)                     |
| rs48407506        | 23257246                    | 22146774                    | A                         | G                            |                                  | FAC1 (M00456)                                |
| rs49292343        | 23257245                    | 22146773                    | T                         | A                            |                                  | FAC1 (M00456)                                |
| rs51735649        | 23257094                    | 22146622                    | C                         | T                            |                                  | Muscle initiator sequences-19 (M00323)       |
| rs33612810        | 23256679                    | 22146207                    | A                         | G                            | ENSMUSR00000397963               |                                              |
| rs33559386        | 23256427                    | 22145955                    | G                         | C                            | ENSMUSR00000397963               |                                              |
| rs33189424        | 23256368                    | 22145896                    | A                         | G                            | ENSMUSR00000397963               |                                              |
| rs49087640        | 23256134                    | 22145662                    | C                         | T                            |                                  | Tst-1 (M00133)                               |

|            |          |          |   |   |                    |                                                                                                                                                                                      |
|------------|----------|----------|---|---|--------------------|--------------------------------------------------------------------------------------------------------------------------------------------------------------------------------------|
| rs33450716 | 23242568 | 22132096 | C | T |                    | PPARGgamma:RXRalpha (M00512), LEF1, TCF1 (M00978), PPAR, HNF-4, COUP, RAR (M00762), HNF-4 (M01031), PPAR direct repeat 1 (M00763), HNF4alpha (M00638), COUP direct repeat 1 (M00765) |
| rs49767895 | 23242250 | 22131778 | G | T |                    | Oct-1 (M00136)                                                                                                                                                                       |
| rs13474140 | 23238914 | 22128442 | T | C |                    | Ets-1 p54 (M01078), v-Myb (M00227), BRCA1:USF2 (M01082)<br>FOXJ2 (M00423), PLZF (M01075), C/EBP/gamma (M00622)                                                                       |
| rs32641536 | 23236602 | 22126130 | A | G |                    |                                                                                                                                                                                      |
| rs51839162 | 23235528 | 22125056 | G | A | ENSMUSR00000397962 |                                                                                                                                                                                      |
| rs48010023 | 23235514 | 22125042 | C | T | ENSMUSR00000397962 |                                                                                                                                                                                      |
| rs33210112 | 23228975 | 22118503 | C | T |                    | Tst-1 (M00133)                                                                                                                                                                       |
| rs45645647 | 23154126 | 22043654 | G | A |                    | STAT (M00777)                                                                                                                                                                        |
| rs33155370 | 23085975 | 21975503 | C | T |                    | VDR, CAR, PXR (M00966)                                                                                                                                                               |
| rs50493771 | 23057769 | 21947297 | T | G |                    | HNF3alpha (M00724)                                                                                                                                                                   |

(B)

| Ensembl Regulatory Feature ID | Sensitivity to |  | Transcription Factor Binding |       |        |      |       |     |       | Histone Methylation |          |         |         | Histone Acetylation |        | Polymerase Binding |
|-------------------------------|----------------|--|------------------------------|-------|--------|------|-------|-----|-------|---------------------|----------|---------|---------|---------------------|--------|--------------------|
|                               | DNase1         |  | CTCF                         | Esrrb | C/Nmyc | E2F1 | Esrrb | Max | NELFe | Zfx                 | H3K36me3 | H3K4me1 | H3K4me3 | H3K4me2             | H3K9ac | PoII               |
| ENSMUSR00000225022            |                |  | 3                            | 3     | 1      |      |       |     |       |                     | 3        | 1       |         |                     |        |                    |
| <b>ENSMUSR00000299557</b>     |                |  | 5                            |       |        | 7    | 1     | 2   | 4     | 1                   | 3        | 1       | 10      | 1                   | 2      | 4                  |
| ENSMUSR00000397963            |                |  | 1                            |       |        |      |       |     |       |                     |          |         |         |                     |        |                    |
| ENSMUSR00000397962            |                |  | 2                            | 1     |        |      |       |     |       |                     |          |         | 1       | 1                   |        |                    |

Cell values indicate the number of experimental sources providing evidence for each transcription regulatory relation to a given feature.
