# Supplementary material
Source: PubMed Central journal article supplement (PMC4125407)
Supplement: c2bbffb691bd37a7d81cd4c8455e2e6d_genetics.114.166165-4.pdf [file c2bbffb691bd37a7d81cd4c8455e2e6d_genetics.114.166165-4.pdf]

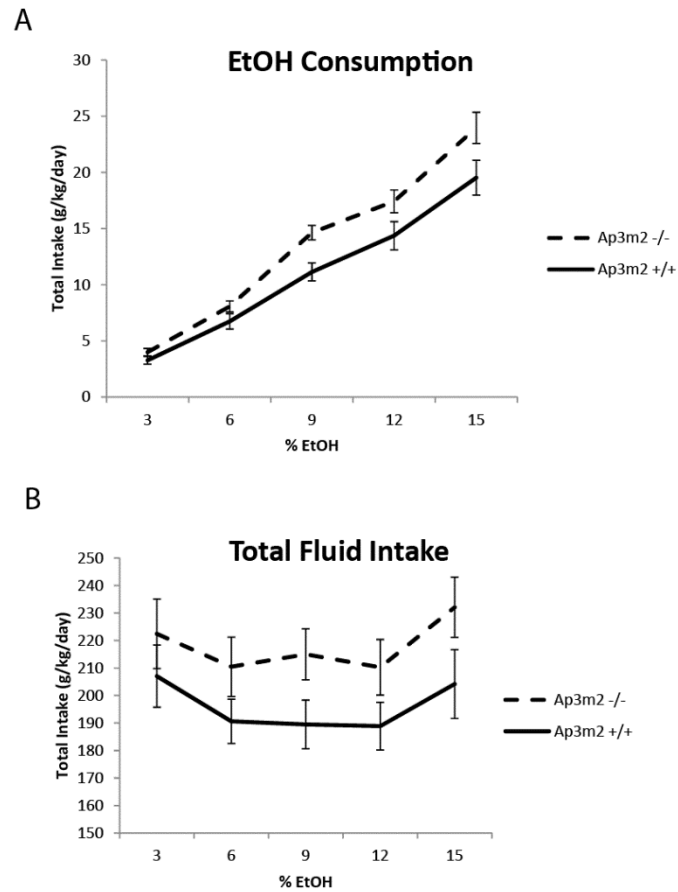

**Figure S2** (A) Ethanol intake in g/kg/day for 3, 6, 9, 12 and 15% EtOH concentrations. Ethanol intake in g/kg/day for 3, 6, 9, 12 and 15% EtOH concentrations.  $F_{\text{time} \times \text{genotype}(4,33)}=2.8294$ ,  $p=0.0402$ . (B) No differences in total intake over time by genotype  $F_{(4,33)}=0.01526$ ,  $p=0.9605$  but an overall genotype effect  $F_{(1,36)}=5.7433$ ,  $p=0.0219$ .
