# Supplementary material
Source: PubMed Central journal article supplement (PMC4125407)
Supplement: c3766d749aefeae88ac85acf67d14be3_genetics.114.166165-1.pdf [file c3766d749aefeae88ac85acf67d14be3_genetics.114.166165-1.pdf]

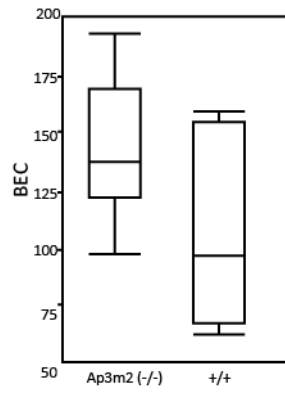

**Figure S1** Blood ethanol concentrations at 72 hours post vapor exposure were not significantly different in *Ap3m2* (-/-) mice compared to wild-type littermates (+/+).

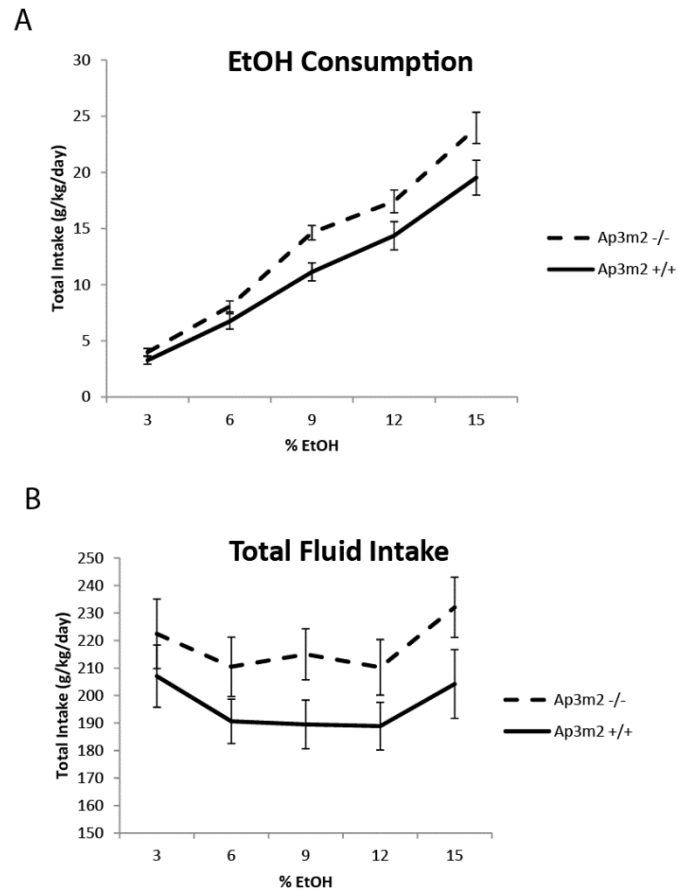

**Figure S2** (A) Ethanol intake in g/kg/day for 3, 6, 9, 12 and 15% EtOH concentrations. Ethanol intake in g/kg/day for 3, 6, 9, 12 and 15% EtOH concentrations.  $F_{\text{time} \times \text{genotype}(4,33)}=2.8294$ ,  $p=0.0402$ . (B) No differences in total intake over time by genotype  $F_{(4,33)}=0.01526$ ,  $p=0.9605$  but an overall genotype effect  $F_{(1,36)}=5.7433$ ,  $p=0.0219$ .

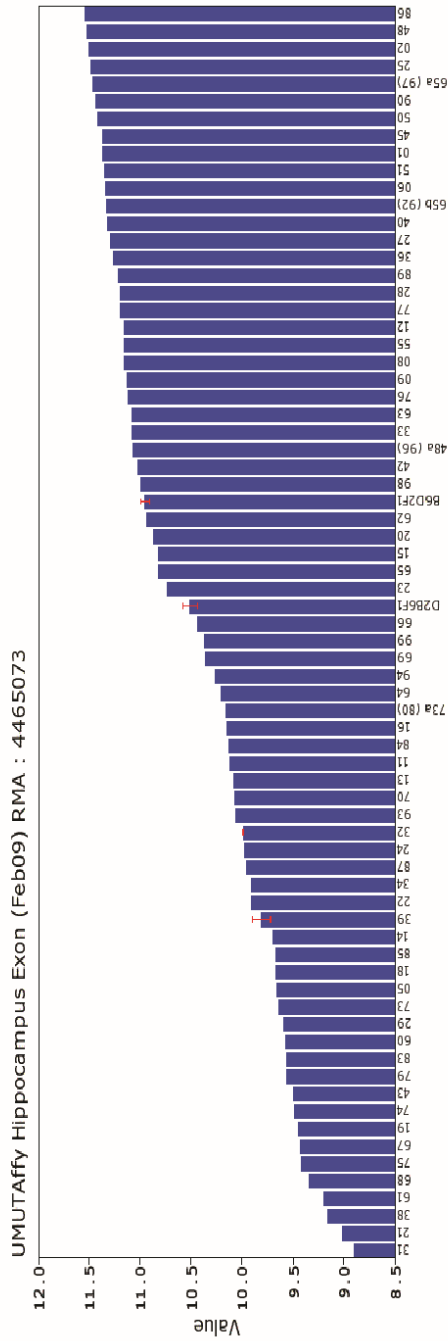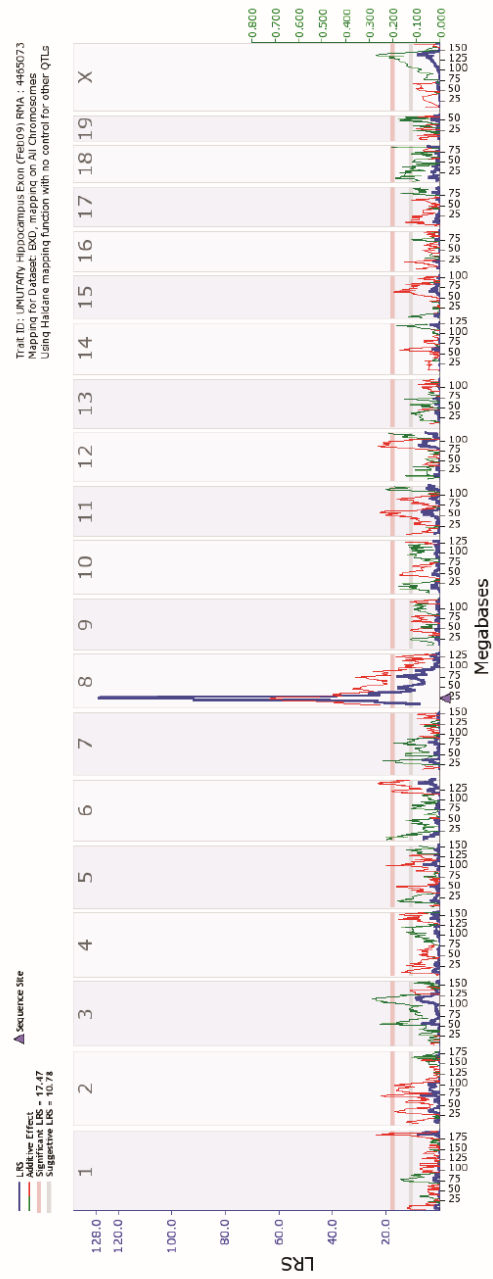

**Figure S3** (A) Log<sub>2</sub> expression levels for *Ap3m2* in hippocampus of BXD RI strains and (B) corresponding cis eQTL signal. Chromosome numbers are at the top of the plot. The blue line represents the likelihood ratio statistic (LRS) across the genome. Two horizontal lines mark the genome-wide significance levels at  $p < 0.05$  (red line) and  $p < 0.63$  (gray line).

**Table S1 Table of oligonucleotide primer pairs used for the sequencing of *Ap3m2* and genotyping of *Ap3m2KO* mice.**

| Primer Sequence 5' to 3'               | Primer Name    |
|----------------------------------------|----------------|
| ATG CTG GAC AAT GGG TTC CCC            | Ap3m2WTFwd     |
| AAT TGT AGG GTT CTC ATC GGG            | Ap3m2WTRev     |
| CAC CGG CCT CTC CAC CAT G              | Egfp_fwd       |
| GTG TTC TGC TGG TAG TGG TCG            | Egfp_REV       |
| AGC CCA CCA AAG GTT TGG T              | Ap3m2Fwdcds    |
| GAC AGT GTC GTG TTG GCA GTA TC         | Ap3m2Revcds-r  |
| GTA CTT CTC CCC GTA CAT ATC CAG A      | Ap3m23'Fwd     |
| GAA CCT CTT AAT GGG CCC TAA AG         | Ap3m23'Rev-r   |
| GGA GAC ACC CTA GTT TGT CTA CAG TG     | Ap3m25utr fwd  |
| GTG CAA GGA GCA CTG CG                 | Ap3m25utrRev-r |
| GAA ACC ACA GAG AAA CTC TAC TCG G      | Ap3m2Proxfwd   |
| CAG GAC TGA GAG GCT GGT GTG            | Ap3m2proxrev-r |
| GAG ACT CAT CTA GAT TGG CAC GAC        | Ap3m2p1r       |
| ACT GTG CAC CTG CGT TGC                | Ap3m2p1        |
| CGG TAA GAT GAA GTG TGA AGG G          | Ap3m2p2        |
| AAC AGT GTG CAG AGA AAA ATA GGC        | Ap3m2p2r       |
| GAC CGT GAC CAC TCC CTC C              | Ap3m2p3        |
| CCA GGG ACC AAC TTT CAC AAG            | Ap3m2p3r       |
| CAA ACA GAA TCA GTT TGC CGG            | Ap3m2p4        |
| CCA CCC AAC CTC AAG ATC TCT C          | Ap3m2p4r       |
| GGG ACC CTC CCT AAA TTA ACC A          | Ap3m2p5        |
| ACT GTC AGT CTG GAT AAC ACA CTG C      | Ap3m2p5r       |
| GGA AAT TGT TGT GTT CAC CTC TAC A      | Ap3m2p6        |
| CCA AGA GCT GAT CTT GAG GTT C          | Ap3m2p6r       |
| GCC ACC AGG CTC TCC AAC                | Ap3m2p7        |
| CAT TTT CTT CTG TTA TAA TGG ACC ATT CT | Ap3m2p7r       |
| CAC AGC TCT GTG AGA GAT TTG AAA C      | Ap3m2p8        |
| GTT TGC TCA GGT CTC CTG TGC            | Ap3m2p8r       |
| GAG TAG ATC TCT CGT GTG GGA AAA C      | Ap3m2p9        |
| CTG CGC TGA GCT GTT GAA C              | Ap3m2p9r       |
| CTG CTC CCC ACA ATT GAC TC             | Ap3m2p10       |
| AGT GTG ATG GTA AAT ACT GAT TTT CAA CT | Ap3m2p10r      |

**Table S2 Hardy-Weinberg Equilibrium analysis of the region of *Ap3m2* at the time of the F2 mapping.**

|          | AA | AB | BB | observed |      | expected |      | $P(X)^2$ | $X^2$    |
|----------|----|----|----|----------|------|----------|------|----------|----------|
|          |    |    |    | $p$      | $q$  | $p$      | $q$  |          |          |
| D8Mit4   | 24 | 46 | 17 | 47       | 40   | 43.5     | 43.5 | 0.452966 | 86.88635 |
| D8Mit25  | 27 | 44 | 17 | 49       | 39   | 44       | 44   | 0.286422 | 93.95222 |
| D8Mit312 | 22 | 48 | 20 | 46       | 44   | 45       | 45   | 0.833029 | 76.11416 |
| D8Mit113 | 30 | 37 | 17 | 48.5     | 35.5 | 42       | 42   | 0.156069 | 95.98514 |
| D8Mit320 | 23 | 45 | 19 | 45.5     | 41.5 | 43.5     | 43.5 | 0.668036 | 79.78677 |

**Table S3** (A) SNPs which exist in the region of *Ap3m2* fit the distribution pattern of C57BL/6J=I/LnJ=iWSP-2 and AKR=129=DBA2=iWSR-1 and are the likely underlying causative nucleotides involved in the altered regulation of *Ap3m2* and the phenotypic differences mapped in the two QTL studies due to their identification as being within a regulatory feature. (B) Summary of the reported experimental evidence for each of the Ensembl regulatory features identified in A.

(A)

| RefSnplD          | Build 37<br>SNP<br>location | Build 38<br>SNP<br>location | SNP Genotypes             |                              | Ensembl Regulatory<br>Feature ID | Transfac regulatory<br>features (BIOBASE ID) |
|-------------------|-----------------------------|-----------------------------|---------------------------|------------------------------|----------------------------------|----------------------------------------------|
|                   |                             |                             | C57BL/6J;<br>I/LnJ<br>(+) | 129P3/J;AKR/J;<br>DBA/2J (-) |                                  |                                              |
| rs33255299        | 23605138                    | 22494666                    | C                         | T                            |                                  | Pax-3 (M00327)                               |
| rs45867690        | 23604110                    | 22493638                    | C                         | T                            |                                  | POU1F1 (M00744)                              |
| rs33346701        | 23601865                    | 22491393                    | A                         | T                            |                                  | VDR, CAR, PXR (M00096)                       |
| rs51987012        | 23597278                    | 22486806                    | A                         | G                            | ENSMUSR00000225022               | VDR, CAR, PXR (M00096)                       |
| rs45944337        | 23597260                    | 22486788                    | A                         | T                            | ENSMUSR00000225022               | C - GR (M00205)                              |
| rs49759176        | 23594851                    | 22484379                    | T                         | C                            |                                  | SMAD3 (M00701)                               |
| rs32743569        | 23589809                    | 22479337                    | C                         | T                            |                                  | myogenin / NF-1 (M00056)                     |
| rs32650954        | 23589790                    | 22479318                    | T                         | C                            |                                  | myogenin / NF-1 (M00056)                     |
| <b>rs32926479</b> | 23587531                    | <b>22477059</b>             | <b>C</b>                  | <b>T</b>                     | <b>ENSMUSR00000299557</b>        |                                              |
| <b>rs25959964</b> | 23587232                    | <b>22476760</b>             | <b>C</b>                  | <b>G</b>                     | <b>ENSMUSR00000299557</b>        | <b>GABP (M00341)</b>                         |
| <b>rs52251207</b> | 23587140                    | <b>22476668</b>             | <b>T</b>                  | <b>C</b>                     | <b>ENSMUSR00000299557</b>        | <b>ETF (M00695)</b>                          |
| <b>rs32882991</b> | 23587093                    | <b>22476621</b>             | <b>T</b>                  | <b>C</b>                     | <b>ENSMUSR00000299557</b>        |                                              |
| rs33346694        | 23583851                    | 22473379                    | C                         | A                            |                                  | Kid3 (M01160);myogenin / NF-1 (M0056)        |
| rs33468918        | 23259740                    | 22149268                    | G                         | A                            |                                  | CdxA (M00101)                                |
| rs32693908        | 23259552                    | 22149080                    | A                         | T                            |                                  | myogenin / NF-1 (M00056)                     |
| rs33391608        | 23259407                    | 22148935                    | C                         | T                            |                                  | myogenin / NF-1 (M00056)                     |
| rs48407506        | 23257246                    | 22146774                    | A                         | G                            |                                  | FAC1 (M00456)                                |
| rs49292343        | 23257245                    | 22146773                    | T                         | A                            |                                  | FAC1 (M00456)                                |
| rs51735649        | 23257094                    | 22146622                    | C                         | T                            |                                  | Muscle initiator sequences-19 (M00323)       |
| rs33612810        | 23256679                    | 22146207                    | A                         | G                            | ENSMUSR00000397963               |                                              |
| rs33559386        | 23256427                    | 22145955                    | G                         | C                            | ENSMUSR00000397963               |                                              |
| rs33189424        | 23256368                    | 22145896                    | A                         | G                            | ENSMUSR00000397963               |                                              |
| rs49087640        | 23256134                    | 22145662                    | C                         | T                            |                                  | Tst-1 (M00133)                               |

|            |          |          |   |   |                                                                                                                                                                                      |
|------------|----------|----------|---|---|--------------------------------------------------------------------------------------------------------------------------------------------------------------------------------------|
| rs33450716 | 23242568 | 22132096 | C | T | PPARGgamma:RXRalpha (M00512), LEF1, TCF1 (M00978), PPAR, HNF-4, COUP, RAR (M00762), HNF-4 (M01031), PPAR direct repeat 1 (M00763), HNF4alpha (M00638), COUP direct repeat 1 (M00765) |
| rs49767895 | 23242250 | 22131778 | G | T | Oct-1 (M00136)                                                                                                                                                                       |
| rs13474140 | 23238914 | 22128442 | T | C | Ets-1 p54 (M01078), v-Myb (M00227), BRCA1:USF2 (M01082)<br>FOXJ2 (M00423), PLZF (M01075), C/EBP/gamma (M00622)                                                                       |
| rs32641536 | 23236602 | 22126130 | A | G |                                                                                                                                                                                      |
| rs51839162 | 23235528 | 22125056 | G | A | ENSMUSR00000397962                                                                                                                                                                   |
| rs48010023 | 23235514 | 22125042 | C | T | ENSMUSR00000397962                                                                                                                                                                   |
| rs33210112 | 23228975 | 22118503 | C | T | Tst-1 (M00133)                                                                                                                                                                       |
| rs45645647 | 23154126 | 22043654 | G | A | STAT (M00777)                                                                                                                                                                        |
| rs33155370 | 23085975 | 21975503 | C | T | VDR, CAR, PXR (M00966)                                                                                                                                                               |
| rs50493771 | 23057769 | 21947297 | T | G | HNF3alpha (M00724)                                                                                                                                                                   |

(B)

| Ensembl Regulatory Feature ID | Sensitivity to |   | Transcription Factor Binding |       |        |      |       |     |       | Histone Methylation |          |         |         | Histone Acetylation |        | Polymerase Binding |
|-------------------------------|----------------|---|------------------------------|-------|--------|------|-------|-----|-------|---------------------|----------|---------|---------|---------------------|--------|--------------------|
|                               | DNase1         |   | CTCF                         | Esrrb | C/Nmyc | E2F1 | Esrrb | Max | NELFe | Zfx                 | H3K36me3 | H3K4me1 | H3K4me3 | H3K4me2             | H3K9ac | PoII               |
| ENSMUSR00000225022            | 3              | 3 | 1                            |       |        |      |       |     |       |                     | 3        | 1       |         |                     |        |                    |
| <b>ENSMUSR00000299557</b>     | 5              |   |                              |       | 7      | 1    | 2     | 4   | 1     | 3                   | 1        |         | 10      | 1                   | 2      | 4                  |
| ENSMUSR00000397963            | 1              |   |                              |       |        |      |       |     |       |                     |          |         |         |                     |        |                    |
| ENSMUSR00000397962            | 2              | 1 |                              |       |        |      |       |     |       |                     |          |         | 1       | 1                   |        |                    |

Cell values indicate the number of experimental sources providing evidence for each transcription regulatory relation to a given feature.
