# Supplementary material
Source: PubMed Central journal article supplement (PMC4125407)
Supplement: fb3cf8009a41cc4ea6dfbaa41b143d61_genetics.114.166165-7.pdf [file fb3cf8009a41cc4ea6dfbaa41b143d61_genetics.114.166165-7.pdf]

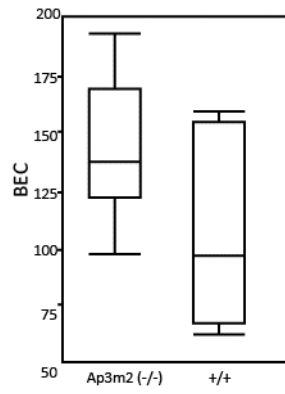

**Figure S1** Blood ethanol concentrations at 72 hours post vapor exposure were not significantly different in *Ap3m2* (-/-) mice compared to wild-type littermates (+/+).
